# Supplementary material for: Novel RICTOR amplification harbouring entities: FISH validation of RICTOR amplification in tumour tissue after next-generation sequencing
Source: PubMed Central journal article supplement (PMC10638425; doi:10.1038/s41598-023-46927-x), 2023-11-10
Supplement: 41598_2023_46927_MOESM1_ESM.pdf [file 41598_2023_46927_MOESM1_ESM.pdf]

**Novel *RICTOR* Amplification Harbours Entities - FISH Validation of *RICTOR* Amplification in Tumour Tissue After Next-Generation Sequencing**

**Authors**

Dániel Sztankovics, Ildikó Krencz, Dorottya Moldvai, Titanilla Dankó, Ákos Nagy, Noémi Nagy, Gábor Bedics, András Rókusz, Gergő Papp, Anna-Mária Tőkés, Judit Pápay, Zoltán Sápi, Katalin Dezső, Csaba Bödör, Anna Sebestyén

**Supplementary Table 1.** The detailed case distribution of the main tumour types (regarding the latest WHO Classification of Tumours, 5th edition) of next-generation sequenced malignancies diagnosed between 2018 and 2022 at the Department of Pathology and Experimental Cancer Research, Semmelweis University.

| <b>Main Tumour Types</b>              | <b>Diagnosis</b>                             | <b>Case no.</b> |
|---------------------------------------|----------------------------------------------|-----------------|
| <b>Breast Tumours</b>                 | Carcinoma with apocrine differentiation      | 1               |
|                                       | Invasive breast carcinoma of no special type | 24              |
|                                       | <b>Total</b>                                 | <b>25</b>       |
| <b>Central Nervous System Tumours</b> | Astrocytoma, IDH-mutant                      | 9               |
|                                       | Craniopharyngioma                            | 3               |
|                                       | Desmoplastic infantile astrocytoma           | 1               |
|                                       | Diffuse low-grade glioma, NOS                | 1               |
|                                       | Dysembryoplastic neuroepithelial tumour      | 1               |
|                                       | Embryonal tumour, NOS                        | 3               |
|                                       | Ependymoma                                   | 5               |
|                                       | Ganglioglioma                                | 1               |
|                                       | Germ cell tumour                             | 3               |
|                                       | Glioblastoma                                 | 34              |
|                                       | High-grade glioma, NOS                       | 1               |
|                                       | Langerhans cell histiocytosis                | 1               |
|                                       | Medulloblastoma                              | 11              |
|                                       | Meningioma                                   | 1               |
|                                       | Pilocytic astrocytoma                        | 6               |
|                                       | Primary intracranial sarcoma, NOS            | 1               |
| <b>Total</b>                          | <b>82</b>                                    |                 |

|                                                        |                                                 |                 |
|--------------------------------------------------------|-------------------------------------------------|-----------------|
| <b>Digestive System Tumours</b>                        | Cholangiocarcinoma                              | 10              |
|                                                        | Colorectal adenocarcinoma                       | 45              |
|                                                        | Colorectal neuroendocrine tumour                | 1               |
|                                                        | Gallbladder adenocarcinoma                      | 3               |
|                                                        | Gastric adenocarcinoma                          | 3               |
|                                                        | Germ cell tumour                                | 2               |
|                                                        | Hepatoblastoma                                  | 1               |
|                                                        | Hepatocellular carcinoma                        | 5               |
|                                                        | Oesophageal squamous cell carcinoma             | 1               |
|                                                        | Pancreatic adenocarcinoma                       | 13              |
|                                                        | Pancreatic neuroendocrine tumour                | 4               |
|                                                        | Ampullary carcinoma                             | 1               |
|                                                        | <b>Total</b>                                    | <b>89</b>       |
|                                                        | <b>Female Genital Tumours</b>                   | Choriocarcinoma |
| Clear cell carcinoma of the cervix                     |                                                 | 1               |
| Clear cell carcinoma of the ovary                      |                                                 | 1               |
| Clear cell carcinoma of the vulva                      |                                                 | 1               |
| Endometrial carcinosarcoma                             |                                                 | 2               |
| Endometrioid endometrial carcinoma                     |                                                 | 9               |
| High-grade endometrial stromal sarcoma                 |                                                 | 1               |
| Immature teratoma                                      |                                                 | 3               |
| Endometrial large cell neuroendocrine carcinoma        |                                                 | 1               |
| Neuroendocrine tumour of gynaecological origin         |                                                 | 1               |
| Serous borderline tumour                               |                                                 | 1               |
| Serous endometrial carcinoma                           |                                                 | 1               |
| Small cell carcinoma of the ovary, hypercalcaemic type |                                                 | 2               |
| Squamous cell carcinoma of the cervix                  |                                                 | 4               |
| Tubo-ovarian high-grade serous carcinoma               |                                                 | 20              |
| Undifferentiated endometrial carcinoma                 |                                                 | 1               |
| Uterine leiomyosarcoma                                 |                                                 | 2               |
| <b>Total</b>                                           | <b>52</b>                                       |                 |
| <b>Head and Neck Tumours</b>                           | Acinic cell carcinoma of the salivary glands    | 1               |
|                                                        | Adenoid cystic carcinoma of the salivary glands | 3               |
|                                                        | Low-grade malignant soft tissue tumour, NOS     | 1               |
|                                                        | Oral squamous cell carcinoma                    | 1               |
|                                                        | <b>Total</b>                                    | <b>6</b>        |
| <b>Other Tumours</b>                                   | Carcinoma of unknown primary                    | 4               |
|                                                        | Mucinous adenocarcinoma of unknown origin       | 3               |
|                                                        | Retinoblastoma                                  | 1               |
|                                                        | <b>Total</b>                                    | <b>8</b>        |

|                                     |                                                |           |
|-------------------------------------|------------------------------------------------|-----------|
| <b>Skin Tumours</b>                 | Melanoma                                       | 4         |
|                                     | <b>Total</b>                                   | <b>4</b>  |
| <b>Soft Tissue and Bone Tumours</b> | Alveolar rhabdomyosarcoma                      | 4         |
|                                     | Alveolar soft part sarcoma                     | 1         |
|                                     | Angiomatoid fibrous histiocytoma               | 1         |
|                                     | Angiosarcoma                                   | 3         |
|                                     | Dedifferentiated liposarcoma                   | 4         |
|                                     | Dermatofibrosarcoma protuberans                | 1         |
|                                     | Desmoid fibromatosis                           | 1         |
|                                     | Embryonal rhabdomyosarcoma                     | 1         |
|                                     | Epithelioid haemangioendothelioma              | 1         |
|                                     | Epithelioid sarcoma                            | 3         |
|                                     | Ewing sarcoma                                  | 11        |
|                                     | Infantile fibrosarcoma                         | 2         |
|                                     | Inflammatory myofibroblastic tumour            | 4         |
|                                     | Interdigitating dendritic cell sarcoma         | 3         |
|                                     | Intimal sarcoma                                | 1         |
|                                     | Kaposiform haemangioendothelioma               | 1         |
|                                     | Leiomyosarcoma                                 | 1         |
|                                     | Myofibroblastoma                               | 2         |
|                                     | Myopericytoma                                  | 1         |
|                                     | Nodular fasciitis                              | 3         |
|                                     | Osteosarcoma                                   | 4         |
|                                     | PEComa                                         | 1         |
|                                     | Primitive myxoid mesenchymal tumour of infancy | 1         |
|                                     | Rhabdoid tumour                                | 3         |
|                                     | Sarcoma with <i>BCOR</i> genetic alterations   | 1         |
|                                     | Solitary fibrous tumour                        | 2         |
|                                     | Spindle cell rhabdomyosarcoma                  | 1         |
|                                     | Synovial sarcoma                               | 2         |
|                                     | Undifferentiated pleomorphic sarcoma           | 3         |
|                                     | Undifferentiated small round cell sarcoma      | 2         |
| <b>Total</b>                        | <b>69</b>                                      |           |
| <b>Thoracic Tumours</b>             | Lung adenocarcinoma                            | 22        |
|                                     | Mesothelioma                                   | 3         |
|                                     | Sarcomatoid carcinoma of the lung              | 1         |
|                                     | Small cell lung carcinoma                      | 4         |
|                                     | Squamous cell carcinoma of the lung            | 4         |
|                                     | <b>Total</b>                                   | <b>34</b> |
| <b>Tumours of Endocrine Organs</b>  | Adrenal cortical carcinoma                     | 3         |
|                                     | Medullary thyroid carcinoma                    | 3         |

|                                                       |                                                   |            |
|-------------------------------------------------------|---------------------------------------------------|------------|
|                                                       | Mixed neuroendocrine–non-neuroendocrine carcinoma | 1          |
|                                                       | Neuroblastoma                                     | 14         |
|                                                       | Papillary thyroid carcinoma                       | 12         |
|                                                       | Parathyroid carcinoma                             | 2          |
|                                                       | <b>Total</b>                                      | <b>35</b>  |
| <b>Tumours of Haematopoietic and Lymphoid Tissues</b> | B-cell polymphocytic leukaemia                    | 1          |
|                                                       | Chronic lymphocytic leukaemia                     | 1          |
|                                                       | Diffuse large B-cell lymphoma                     | 3          |
|                                                       | Primary mediastinal large B-cell lymphoma         | 1          |
|                                                       | <b>Total</b>                                      | <b>6</b>   |
| <b>Urinary and Male Genital Tumours</b>               | Prostatic adenocarcinoma                          | 3          |
|                                                       | Urachal carcinoma                                 | 4          |
|                                                       | Urothelial carcinoma                              | 3          |
|                                                       | <b>Total</b>                                      | <b>10</b>  |
|                                                       | $\Sigma$                                          | <b>420</b> |
